# Supplementary material for: Effective systemic siRNA delivery using dual-layer protected long-circulating nanohydrogel containing an inorganic core
Source: Royal Society of Chemistry journal article supplement (doi:10.1039/c9bm00369j), 2019-01-01
Supplement: c9bm00369j1.pdf [file c9bm00369j1.pdf]

Electronic Supplementary Information (ESI) for Biomaterials Science

## **Effective systemic siRNA delivery using dual-layer protected long-circulating nanohydrogel containing inorganic core**

Yue Yin<sup>a,1</sup>, Min Sang Lee<sup>a,1</sup>, Jung Eun Lee<sup>a</sup>, Su Yeon Lim<sup>a</sup>, E Seul Kim<sup>a</sup>, Jaeback Jeong<sup>a</sup>,  
Dahwun Kim<sup>a</sup>, Jaeyun Kim<sup>b</sup>, Doo Sung Lee<sup>b,\*</sup>, and Ji Hoon Jeong<sup>a,\*</sup>

<sup>a</sup>School of Pharmacy, Theranostic Macromolecules Research Center, Sungkyunkwan University,  
Suwon 440-746, Republic of Korea

<sup>b</sup>School of Chemical Engineering, Theranostic Macromolecules Research Center,  
Sungkyunkwan University, Suwon 440-746, Republic of Korea

\*Corresponding authors:

Doo Sung Lee, Ph.D.

Tel.: +82-31-299-6851; Fax: +82-31-299-6857; e-mail: dslee@skku.edu

Ji Hoon Jeong, Ph.D.

Tel.: +82-31-290-7783; Fax: +82-31-292-8800; e-mail: jhjeong@skku.edu

<sup>1</sup>The first two authors contributed equally to this study.

## Supplementary result

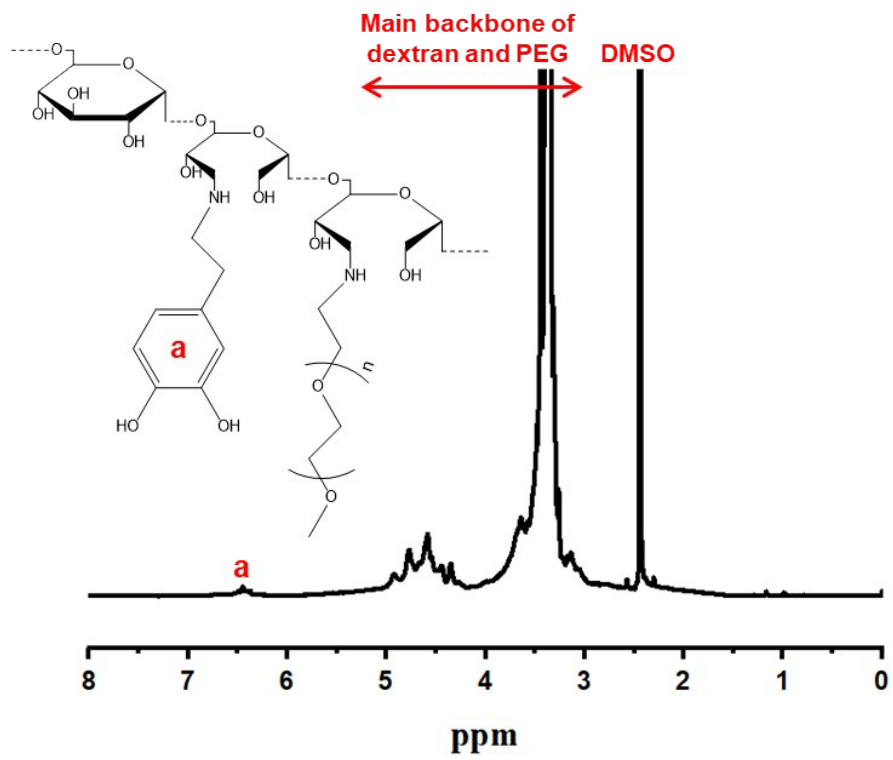

**Figure S1.** <sup>1</sup>H-NMR spectrum of PEG-dextran-dopa.
